# Supplementary material for: Size-controlled porous superparamagnetic Zn1/3Fe8/3O4 nanospheres: synthesis, properties and application for drug delivery
Source: Royal Society of Chemistry journal article supplement (doi:10.1039/c4ra02082k), 2014-01-01
Supplement: c4ra02082k1.pdf [file c4ra02082k1.pdf]

## Supporting Information

### Sized-controlled porous superparamagnetic $\text{Zn}_{1/3}\text{Fe}_{8/3}\text{O}_4$ nanospheres: synthesis, properties and application for drug delivery

Shengping Gao, Changyu Wu, Hui Jiang, Donghua Chen, Qiwei Li, Xiaoli Liu,  
XuemeiWang\*

State Key Laboratory of Bioelectronics (Chien-Shiung Wu Lab), School of Biological  
Science and Medical Engineering, Southeast University, Nanjing 210096, China

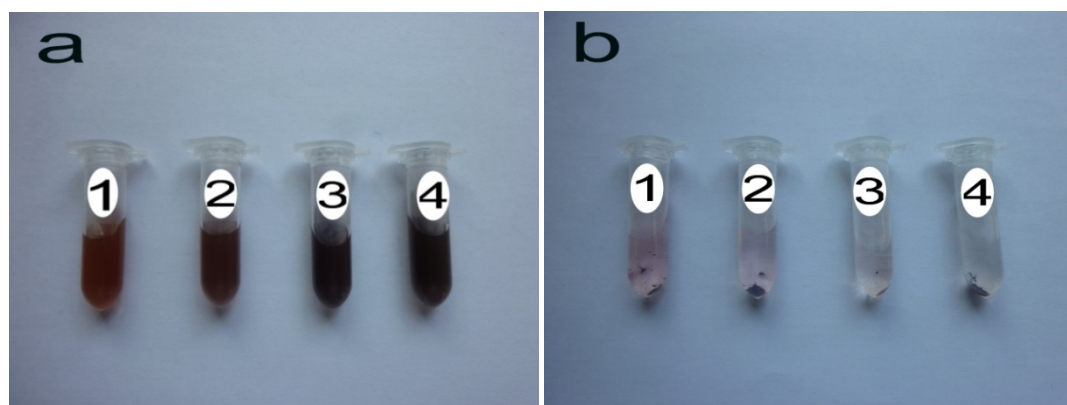

Figure S1. Images of loading capacity of DOX onto different sized of porous SPION in same initial DOX concentrations of the DOX-SPION 6.4 nm (1), 39.0 nm (2), 74 nm (3), and 191 nm (4), showing good water dispersibility and centrifuging ability (b).

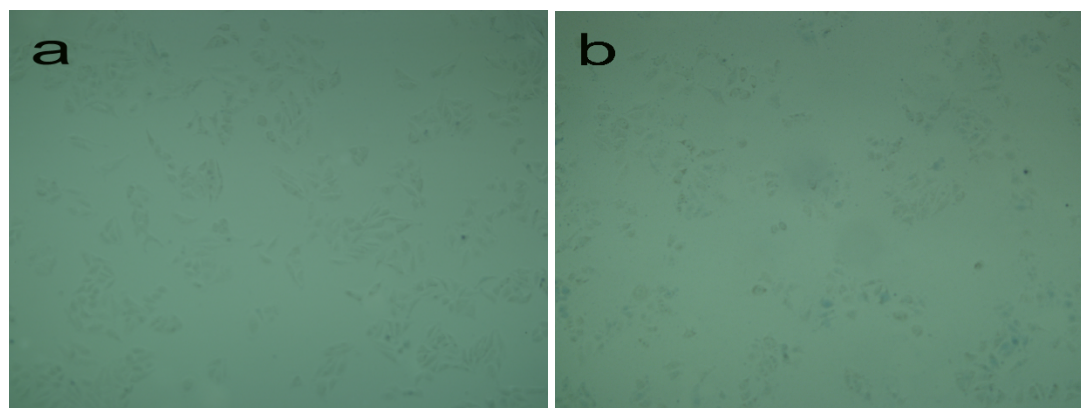

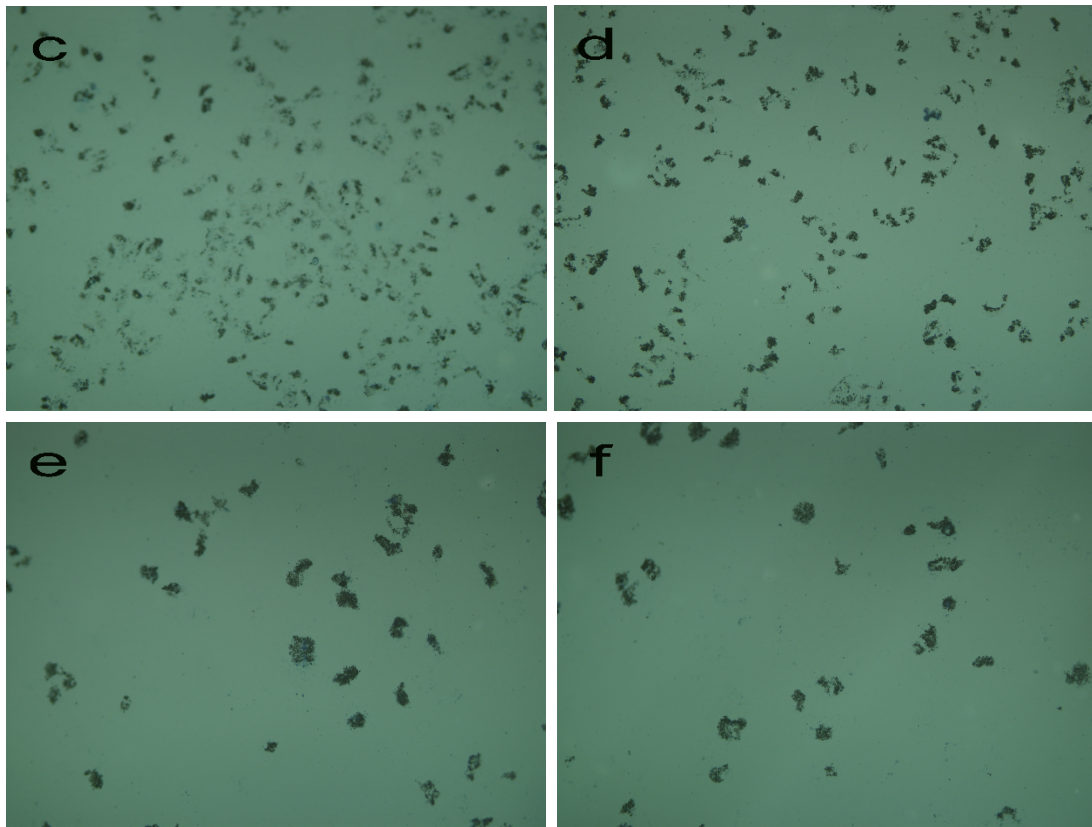

Figure S2. Prussian blue staining of HepG2 cells treated by free DOX (b) and DOX-SPION 6.4 nm (c), 39 nm (d), 74 nm (e), 191 nm (f), respectively. The cells without any treatment are shown as control (a). Blue SPION is clearly visible with Prussian blue staining.
